# Supplementary material
Source: publisher site journal article supplement (https://www.dovepress.com/article/444214)
Supplement: Supplementary file 1 [file get_supplementary_file.php]

Supplementary table 1 Ingredients of TCM formulae

| Formula | Drug composition | Used part | Drug dosage (g) |
| --- | --- | --- | --- |
| JYYPZXZ42 | Radix Codonopsis pilosulae | roots | 15 |
|  | Rhizoma Atractylodis macrocephalae | roots | 10 |
|  | Poria | sclerotium | 10 |
|  | semen coicis | seed | 15 |
|  | Radix Angelicae sinensis | roots | 10 |
|  | Rhizoma Dioscoreae | rhizome | 15 |
|  | Radix Aucklandiae, | roots | 10 |
|  | Radix Paeoniae Alba | roots | 10 |
|  | Pericarpium Citri Reticulatae | - | 6 |
|  | Smilax Chi | - | 10 |
|  | Salviae Chinensis Herba | - | 15 |
|  | Radix Glycyrrhizae | root and rhizome | 3 |
| FLP43 | Radix Astragali | root | - |
|  | Radix Pacis quinquefolii | Root |  |
|  | Ophiopogon japonicus | tuberoid | - |
|  | Herba Hedyotis Diffusae | Entire herb with root | - |
|  | Herba Patriniae | - | - |
|  | Rhizoma Bistortae | rhizome | - |
|  | Semen Juglandis | - | - |
|  | Radix Notoginseng | roots | - |
| YYFZBJS44 | Semen Coicis | seeds | 8 |
|  | Radix Aconiti Lateralis | daughter root | 3 |
|  | Herba Patriniae | roots | 5 |
| mBYD45 | Radix Astragali | root | 30 |
|  | Radix codonopsis | roots | 15 |
|  | Radix angelicae sinensis | root | 10 |
|  | Radix glycyrrhizae | root and rhizome | 5 |
|  | Cimicifugae rhizoma | rhizome | 6 |
|  | Radix bupleuri | root | 6 |
|  | Atractylodes macrocephala | roots | 10 |
|  | Pericarpium citri reticulatae | - | 10 |
|  | Rhizoma Sparganii | tuber | 15 |
|  | Rhizoma Curcumae | tuberoid | 15 |
| FZJD46 | [Aconitum carmichaelii](https://www.sciencedirect.com/topics/pharmacology-toxicology-and-pharmaceutical-science/aconitum-carmichaelii) Debeaux | - | - |
|  | Wuzhimaotao | - | - |
|  | Radix Glycyrrhizae | root and rhizome | - |
|  | Spi gleditsiae | - | - |
|  | Rhizoma Zingiberis | dried rhizome | - |
|  | Flos Lonicerae | flower bud | - |
|  | Pogostemon Cablin (Blanco) Benth | - | - |
|  | Pericarpium Citri Reticulatae | - | - |

Note:

-: not available.

All information of Chinese herbs were taken from the database (http://herb.ac.cn).
